# Supplementary material for: Fabrication of nanoscale heterostructures comprised of graphene-encapsulated gold nanoparticles and semiconducting quantum dots for photocatalysis
Source: Royal Society of Chemistry journal article supplement (doi:10.1039/c5cp00928f), 2015-01-01

### Electronic Supplementary Information (ESI†)

Fabrication of nanoscale heterostructures comprised of graphene-encapsulated gold nanoparticles and semiconducting quantum dots for photocatalysis

*Yuan Li,<sup>a</sup> Nitin Chopra<sup>\*,a,b,c</sup>*

<sup>a</sup> Metallurgical and Materials Engineering Department, Center for Materials for Information Technology (MINT), The University of Alabama, Tuscaloosa, AL 35487, U.S.A.

<sup>b</sup> Department of Biological Sciences, The University of Alabama, Tuscaloosa, AL 35487, U.S.A.

<sup>c</sup> Department of Chemistry, The University of Alabama, Tuscaloosa, AL 35487, U.S.A.

**\*Corresponding Author**

E-mail: [nchopra@eng.ua.edu](mailto:nchopra@eng.ua.edu);

Tel: [205-348-4153](tel:205-348-4153)

**Table S1** Diameter, inter-particle spacing, and density of gold (Au) nanoparticles, as-produced GNPs, and the GNPs after plasma/acid treatment patterned on the (silicon) Si substrate.

| Samples             | Diameter (nm)     | Inter-particle spacing (nm) | Density ( $10^8/\text{cm}^2$ ) |
|---------------------|-------------------|-----------------------------|--------------------------------|
| Au nanoparticles    | $47.27 \pm 11.25$ | $49.55 \pm 16.85$           | 74.51                          |
| GNPs                | $52.22 \pm 11.33$ | $45.14 \pm 13.33$           | 72.23                          |
| Plasma-treated GNPs | $49.56 \pm 12.38$ | $46.22 \pm 13.57$           | 72.03                          |
| Acid-treated GNPs   | $50.62 \pm 10.95$ | $47.56 \pm 14.65$           | 70.67                          |

**Table S2** Raman peak location ( $\text{cm}^{-1}$ ) and  $I_D/I_G$  for as-produced GNPs and GNPs after plasma/acid treatment.

|                     | D band  | G band  | $I_D/I_G$       |
|---------------------|---------|---------|-----------------|
| GNPs                | 1319.87 | 1602.07 | $1.3 \pm 0.2$   |
| acid-treated GNPs   | 1312.56 | 1599.21 | $1.2 \pm 0.1$   |
| plasma-treated GNPs | 1312.56 | 1596.18 | $1.75 \pm 0.25$ |

**Table S3** Binding energy (eV) chart derived from XPS study for Au nanoparticles, as-produced GNPs, plasma-treated GNPs, acid-treated GNPs, and the pristine quantum dots (QDs).

|                  |                        | Au nanoparticles | Plasma-treated Au nanoparticles | GNPs   | Plasma-treated GNPs | Acid-treated GNPs | QDs     |
|------------------|------------------------|------------------|---------------------------------|--------|---------------------|-------------------|---------|
| Au               | Au 4f <sub>5/2</sub>   | 88.27            | 87.50                           | 88.23  | 88.47               | 88.20             | /       |
|                  | Au 4f <sub>7/2</sub>   | 84.59            | 84.60                           | 84.56  | 84.76               | 84.47             | /       |
| AuO <sub>x</sub> | Au 4f <sub>5/2</sub>   | /                | 88.90                           | /      | 89.45               | /                 | /       |
|                  | Au 4f <sub>7/2</sub>   | /                | 85.34                           | /      | 85.74               | /                 | /       |
| C 1s             | C-C (sp <sup>2</sup> ) | /                |                                 | 284.78 | 284.78              | 284.72            | /       |
|                  | C-C (sp <sup>3</sup> ) | /                |                                 | 285.30 | 285.26              | 285.15            | /       |
|                  | π - π                  | /                |                                 | 291.05 | /                   | /                 | /       |
| O                | C-OH                   | /                |                                 | 286.75 | 286.91              | 286.45            | /       |
|                  | O=C-OH                 | /                |                                 | 288.81 | 289.14              | 288.71            | /       |
|                  | O 1s                   | 533.21           |                                 | 533.24 | 533.26              | 533.32            | /       |
| QDs              | Cd 3d <sub>5/2</sub>   | /                |                                 | /      | /                   | /                 | 406.07  |
|                  | Cd 3d <sub>3/2</sub>   | /                |                                 | /      | /                   | /                 | 412.78  |
|                  | Se                     | /                |                                 | /      | /                   | /                 | /       |
|                  | Zn 2p <sub>3/2</sub>   | /                |                                 | /      | /                   | /                 | 1022.52 |
| QDs              | Zn 2p <sub>1/2</sub>   | /                |                                 | /      | /                   | /                 | 1045.76 |
|                  | S 2p <sub>3/2</sub>    | /                |                                 | /      | /                   | /                 | 162.75  |
|                  | S 2p <sub>1/2</sub>    | /                |                                 | /      | /                   | /                 | 163.94  |

**Table S4** FTIR peak locations ( $\text{cm}^{-1}$ ) for the as-produced GNPs, GNPs after plasma/acid treatment, and the GNP-QD heterostructures.

| bonds                             | GNPs      | Plasma-treated GNPs | Acid-treated GNPs | GNP (plasma-treated)-QD heterostructures | GNP (acid-treated)-QD heterostructures |
|-----------------------------------|-----------|---------------------|-------------------|------------------------------------------|----------------------------------------|
| C-H, C-C stretch                  | 1510-1540 | 1510-1540           | 1510-1540         | 1510-1540                                | 1510-1540                              |
| C-O-H                             | ~1450     | ~1450               | ~1450             | ~1450                                    | ~1450                                  |
| C=O                               |           | ~1690               | ~1690             | ~1690                                    | ~1690                                  |
| Amide I (C=O stretch)             |           |                     |                   | ~1660                                    | ~1660                                  |
| Amide II (C-N stretch, N-H bend)  |           |                     |                   | ~1550                                    | ~1550                                  |
| Amide III (C-N stretch, N-H bend) |           |                     |                   | ~1240                                    | ~1240                                  |

**Table S5** UV-vis spectra peak locations (nm) for Au nanoparticles, as-produced GNPs, and GNPs after acid/plasma treatment.

|                                                | Au      | Graphene | Quantum dots |
|------------------------------------------------|---------|----------|--------------|
| Au nanoparticles                               | 500-650 | /        | /            |
| GNPs                                           | 500-650 | ~281     | /            |
| acid-treated GNPs                              | 500-650 | ~292     | /            |
| plasma-treated GNPs                            | 500-650 | ~284     | /            |
| Quantum dots                                   | /       | /        | ~460         |
| GNP-QD heterostructures<br>(covalently bonded) | ~580    | ~305     | ~460         |
| GNP-QD (physically mixed)                      | ~550    | ~301     | ~460         |

**Fig. S1** SEM image of the GNPs after (a) plasma and (b) acid treatment. (c) Histogram showing the variation of particle diameter, inter-particle spacing, and density of the Au nanoparticles, as-produced GNPs, and GNPs after plasma/acid treatment. **Table S1** corresponds to (c).

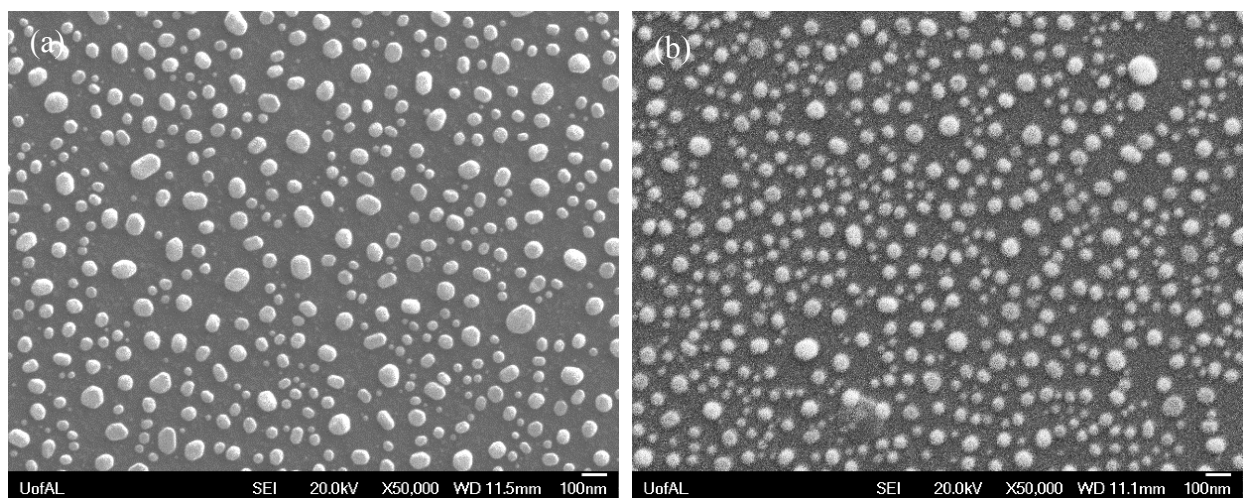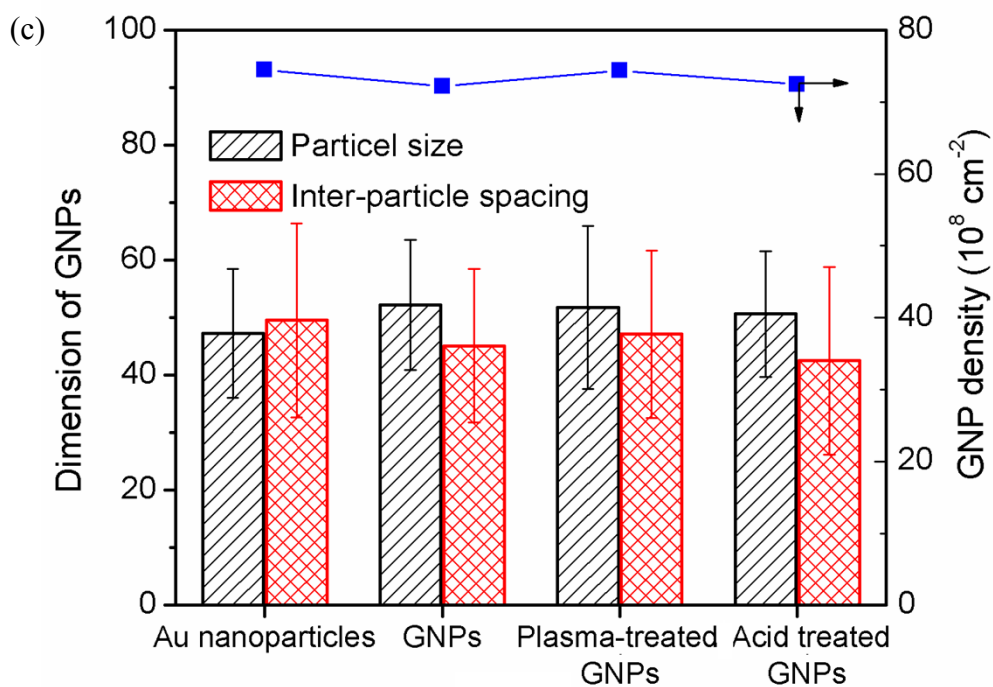

**Fig. S2** XPS spectra obtained in a wide-range survey scan for the Au nanoparticles, as-produced GNPs, and GNPs after plasma/acid treatment.

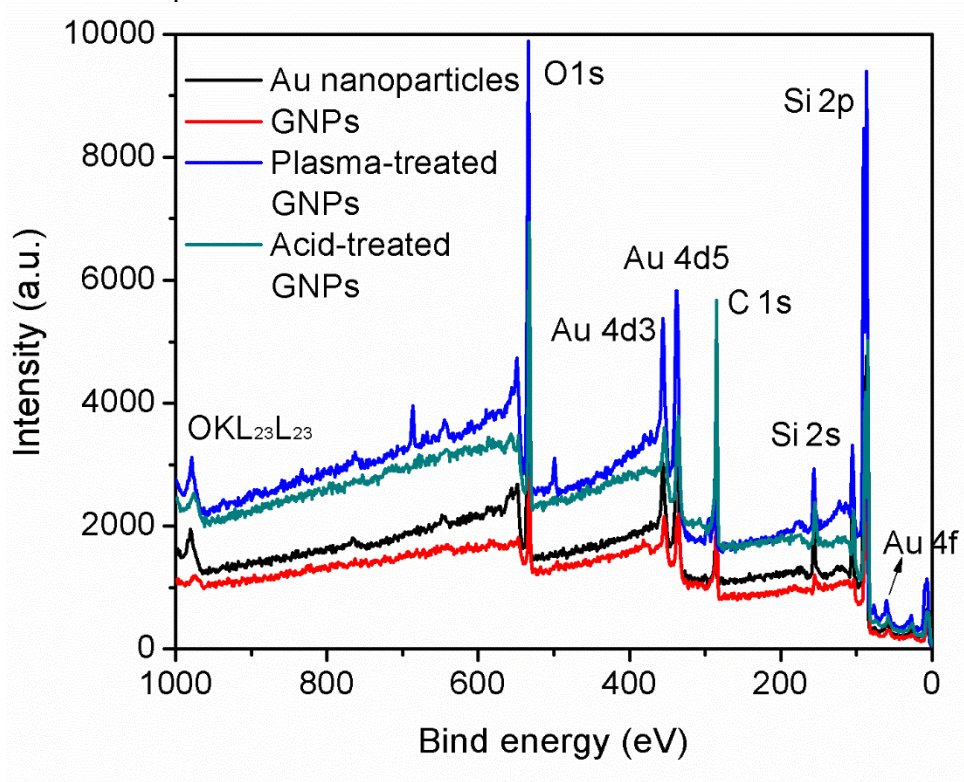

**Fig. S3** Deconvoluted XPS spectra (Au 4f) for (a) Au nanoparticles, (b) plasma-treated Au nanoparticles (before GNP growth), (c) GNPs, and GNPs after (d) plasma and (e) acid treatment. *NOTE: Black scatters show the experimental spectra and the solid lines show the fitted data.*

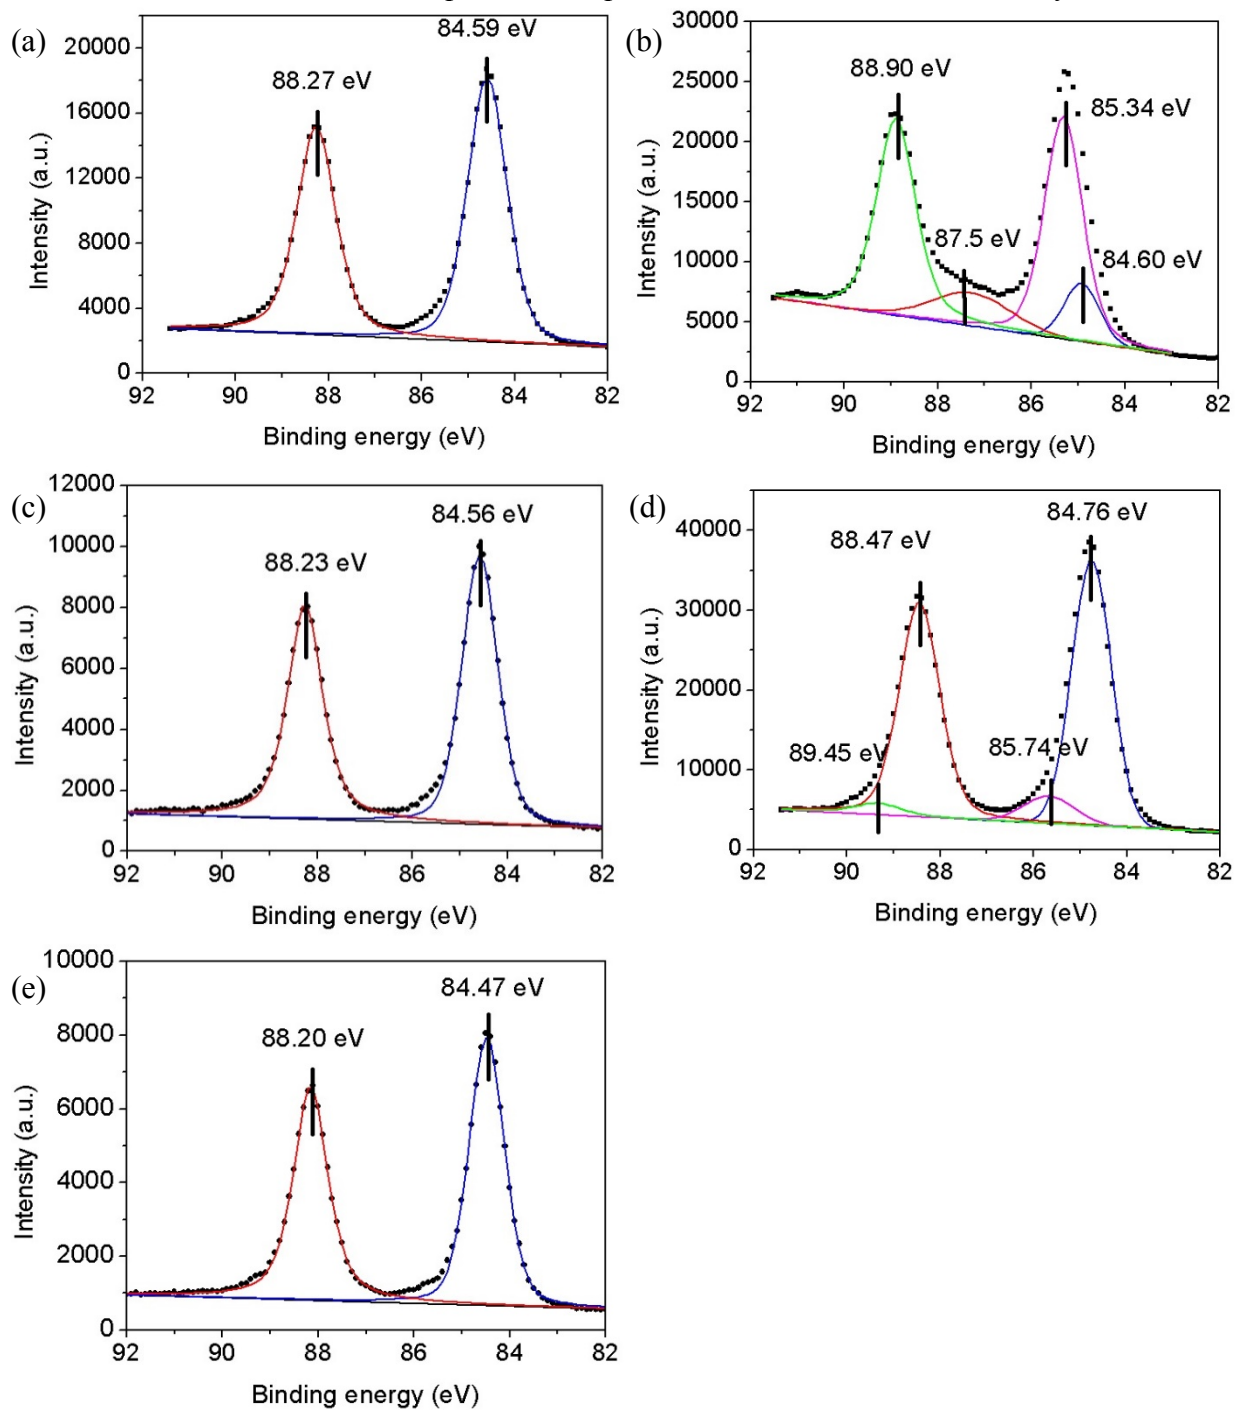



**Fig. S4** TEM image of the pristine  $\text{CdS}_x\text{Se}_{1-x}/\text{ZnS}$  quantum dots.

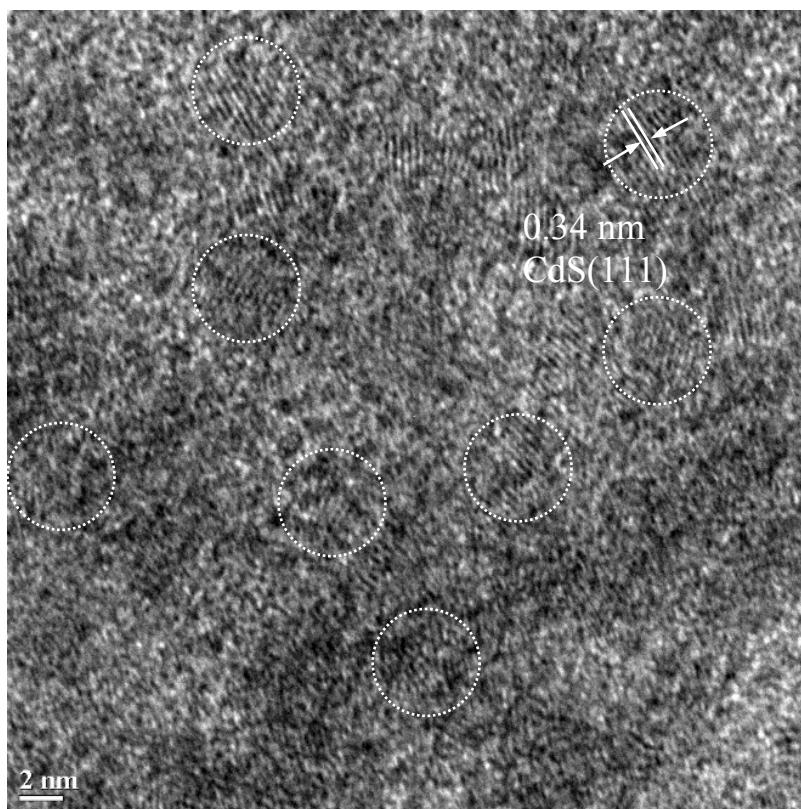

**Fig. S5** XPS spectra (survey scan) of the pristine  $\text{CdS}_x\text{Se}_{1-x}/\text{ZnS}$  quantum dots and GNP-QD heterostructures dispersed on the Si substrate. *Note: The dotted line indicate the expected peak for Se 3d.*

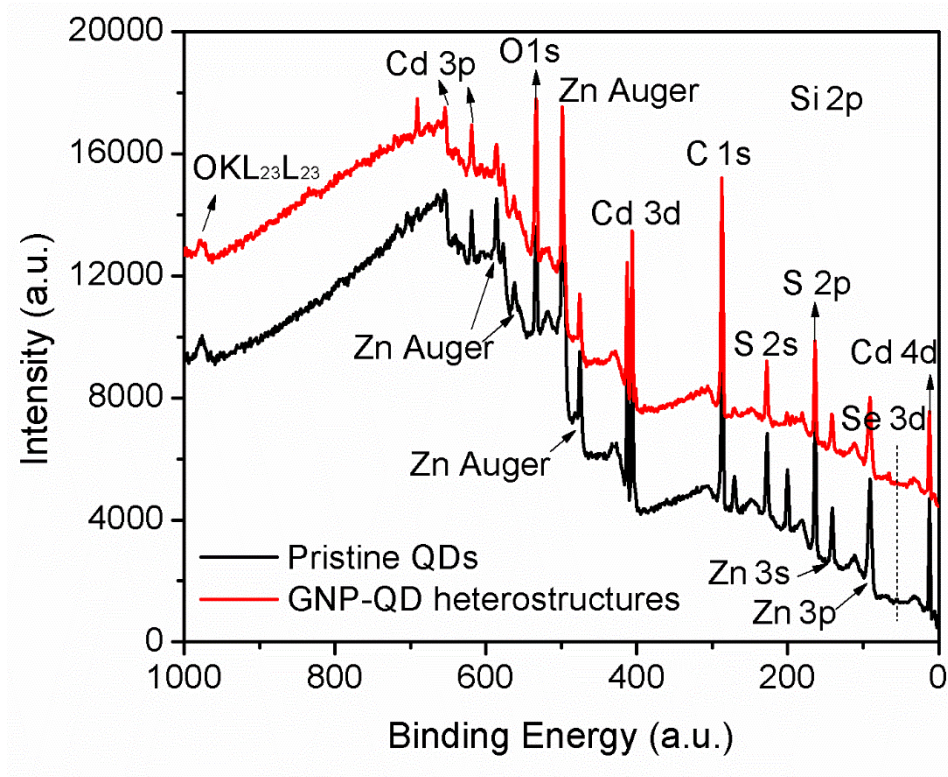

**Fig. S6** Deconvoluted XPS spectra of the pristine  $\text{CdS}_x\text{Se}_{1-x}/\text{ZnS}$  quantum dots corresponding to (a) Cd 3d, (b) Se 3d, (d) Zn 2p, (d) S 2p. *NOTE: Black scatters show the experimental spectra and the solid lines show the fitted data.*

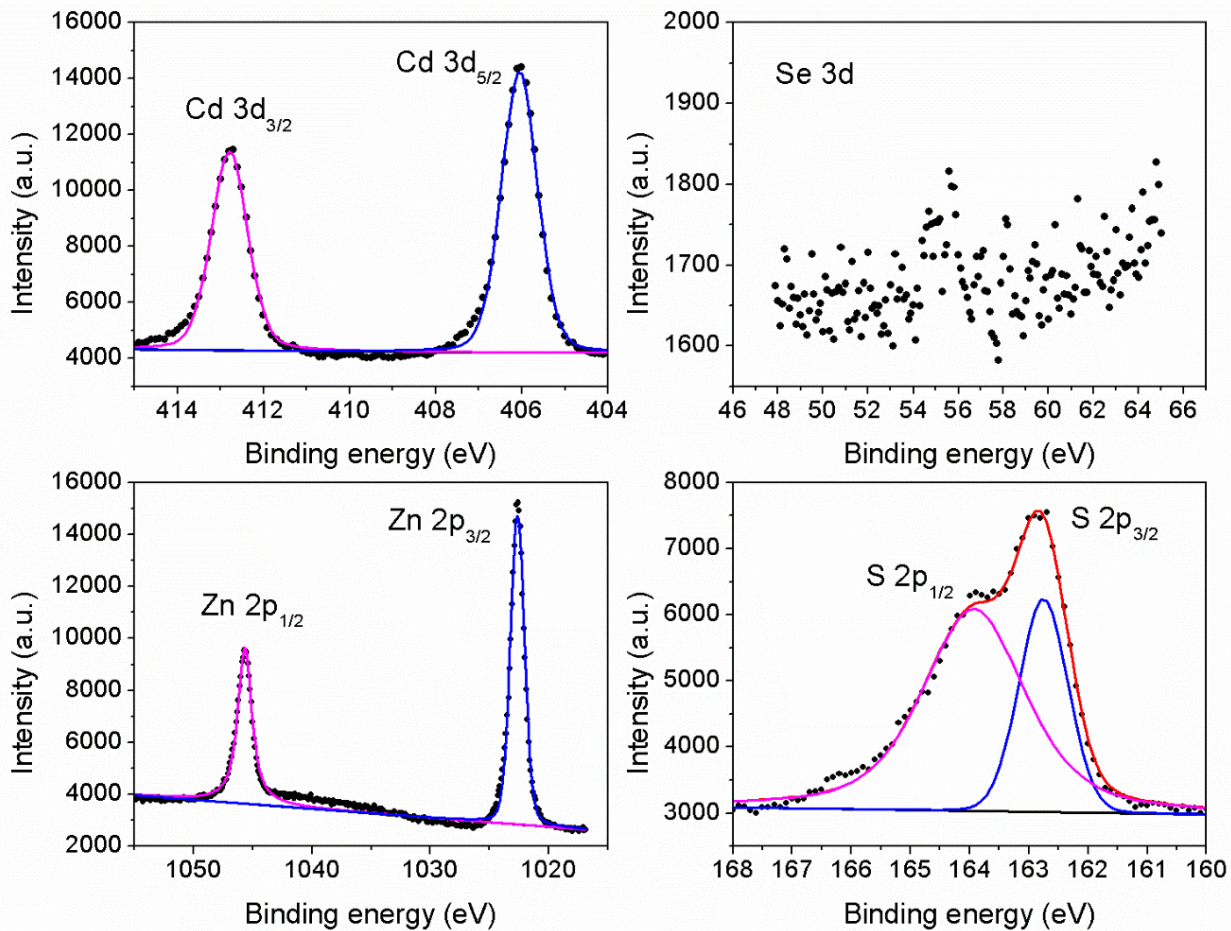

**Fig. S7** Experimental (a) absorbance and (b) reflectance spectra of the pristine quantum dots dispersed on a flat white Teflon substrate. This was used to estimate the effective refractive index of the quantum dots.

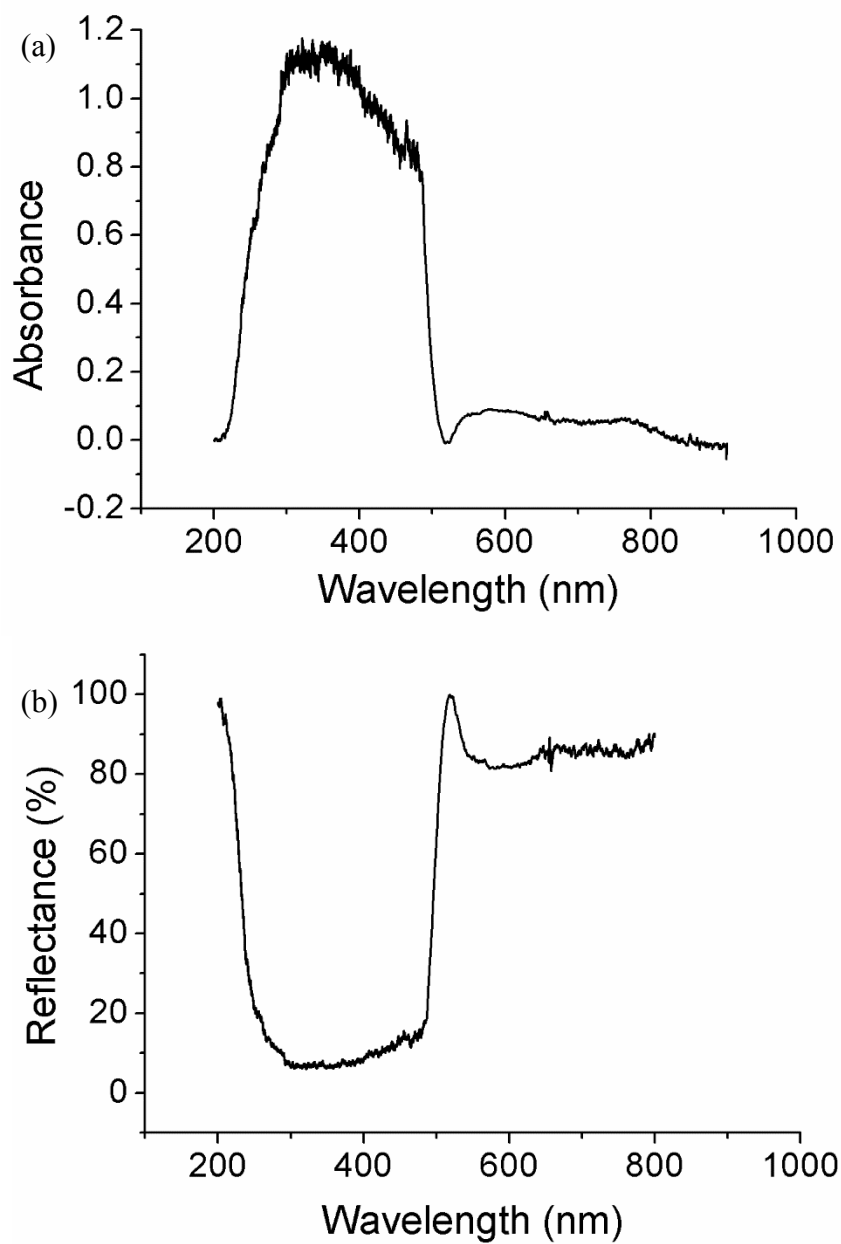

**Fig. S8** Simulated (DDA method) extinction, absorbance, and scattering plots as a function of wavelength for (a) Au nanoparticles, (b) as-produced GNPs, (c) plasma-treated GNPs, and (d) GNP-QD heterostructures.

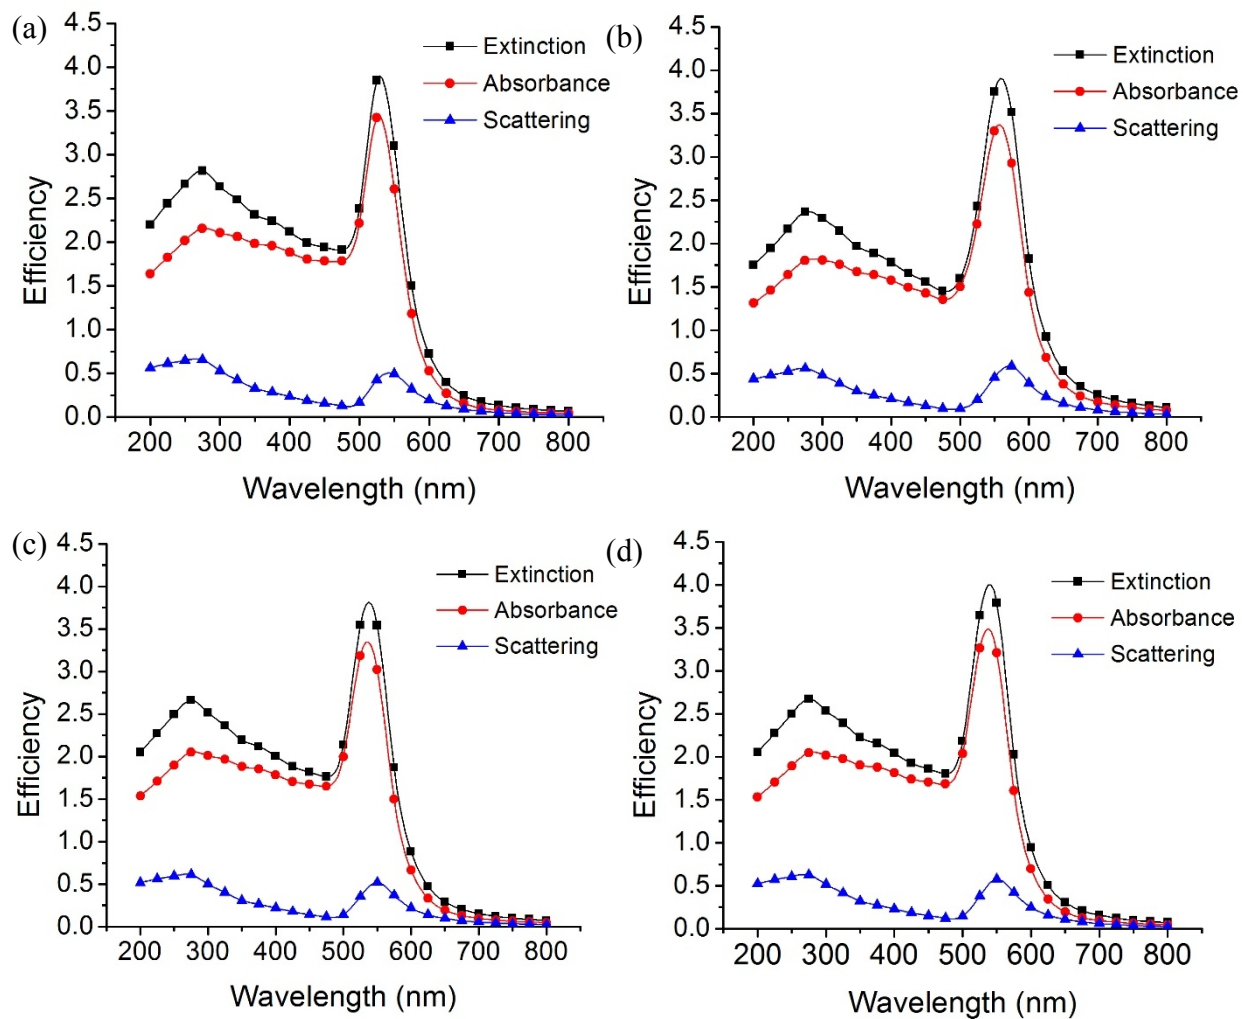

Supplement: c5cp00928f1.pdf [file c5cp00928f1.pdf]
